# Supplementary material for: Augmenting cyan emission in vanadate garnets via Dy3+activation for light emitting devices and multi-mode optical thermometry
Source: Royal Society of Chemistry journal article supplement (doi:10.1039/d3dt01895d), 2023-01-01
Supplement: d3dt01895d1.pdf [file d3dt01895d1.pdf]

## SUPPLEMENTARY INFORMATION

# **Augmenting Cyan Emission in Vanadate Garnet *via* Dy<sup>3+</sup> Activation for Light Emitting Devices and Multi-Mode Optical Thermometry**

Amrithakrishnan Bindhu<sup>a</sup>, Jawahar I. Naseemabeevi<sup>a</sup>, Subodh Ganesanpotti<sup>a</sup> \*

<sup>a</sup>Department of Physics, University of Kerala, Kariavattom Campus, Thiruvananthapuram,  
Kerala - 695 581, India

Email: [gsubodh@gmail.com](mailto:gsubodh@gmail.com), [gsubodh@keralauniversity.ac.in](mailto:gsubodh@keralauniversity.ac.in)

Table S1. The percentage difference of Ionic radii ( $D_r$ ) between host cations and  $Dy^{3+}$ .

| Host cation (CN) | Doped ion (CN) | $R_m$ (Å) | $R_d$ (Å) | $D_r$ (%) |
|------------------|----------------|-----------|-----------|-----------|
| $Sr^{2+}$ (8)    | $Dy^{3+}$ (8)  | 1.26      | 1.027     | 18.5      |
| $Na^+$ (8)       | $Dy^{3+}$ (8)  | 1.18      | 1.027     | 12.9      |
| $Mg^{2+}$ (6)    | $Dy^{3+}$ (8)  | 0.72      | 1.027     | -42.6     |
| $V^{5+}$ (4)     | $Dy^{3+}$ (8)  | 0.355     | 1.027     | -189      |

Table S2. Rietveld refinement and crystallographic parameters of  $Sr_2NaMg_2V_3O_{12}: 0.01 Dy^{3+}$ .

| Formula             | $Sr_{1.98}Na_{1.01}Dy_{0.01}Mg_2V_3O_{12}$    |          |          |          |           |                            |
|---------------------|-----------------------------------------------|----------|----------|----------|-----------|----------------------------|
| Crystal system      | Cubic                                         |          |          |          |           |                            |
| Space group         | $Ia\bar{3}d$ (230, $O_h^{10}$ )               |          |          |          |           |                            |
| Cell Parameters     | $a=12.652(2)$ Å, $V=2025.34$ Å <sup>3</sup>   |          |          |          |           |                            |
| Reliability factors | $R_{wp}=7.85\%$ , $R_p=5.96\%$ and $GOF=1.64$ |          |          |          |           |                            |
| Atom                | Site                                          | x        | y        | z        | Occupancy | $B_{eq}$ (Å <sup>2</sup> ) |
| $Sr^{2+}$           | 24c                                           | 0.375    | 0.5      | 0.25     | 0.65      | 0.009(8)                   |
| $Dy^{3+}$           | 24c                                           | 0.375    | 0.5      | 0.25     | 0.0167    | 0.009(8)                   |
| $Na^+$              | 24c                                           | 0.375    | 0.5      | 0.25     | 0.333     | 0.009(8)                   |
| $Mg^{2+}$           | 16a                                           | 0.50     | 0.50     | 0        | 1         | 0.007(5)                   |
| $V^{5+}$            | 24d                                           | 0.625    | 0.50     | 0.25     | 1         | 0.005(6)                   |
| $O^{2-}$            | 96h                                           | 0.042(3) | 0.048(8) | 0.653(6) | 1         | 0.009(8)                   |

Table S3. Rietveld refinement and crystallographic parameters of Sr<sub>2</sub>NaMg<sub>2</sub>V<sub>3</sub>O<sub>12</sub>: 0.03 Dy<sup>3+</sup>.

| Formula             | Sr <sub>1.94</sub> Na <sub>1.03</sub> Dy <sub>0.03</sub> Mg <sub>2</sub> V <sub>3</sub> O <sub>12</sub> |          |          |          |           |                                   |
|---------------------|---------------------------------------------------------------------------------------------------------|----------|----------|----------|-----------|-----------------------------------|
| Crystal system      | Cubic                                                                                                   |          |          |          |           |                                   |
| Space group         | <i>Ia</i> $\bar{3}$ <i>d</i> (230, <i>O<sub>h</sub></i> <sup>10</sup> )                                 |          |          |          |           |                                   |
| Cell Parameters     | <i>a</i> =12.648(4) Å, <i>V</i> = 2023.52 Å <sup>3</sup>                                                |          |          |          |           |                                   |
| Reliability factors | R <sub>wp</sub> = 5.23%, R <sub>p</sub> = 3.98 % and GOF= 1.23                                          |          |          |          |           |                                   |
| Atom                | Site                                                                                                    | x        | y        | z        | Occupancy | B <sub>eq</sub> (Å <sup>2</sup> ) |
| Sr <sup>2+</sup>    | 24c                                                                                                     | 0.375    | 0.5      | 0.25     | 0.65      | 0.009(8)                          |
| Dy <sup>3+</sup>    | 24c                                                                                                     | 0.375    | 0.5      | 0.25     | 0.0167    | 0.009(8)                          |
| Na <sup>+</sup>     | 24c                                                                                                     | 0.375    | 0.5      | 0.25     | 0.333     | 0.009(8)                          |
| Mg <sup>2+</sup>    | 16a                                                                                                     | 0.50     | 0.50     | 0        | 1         | 0.007(5)                          |
| V <sup>5+</sup>     | 24d                                                                                                     | 0.625    | 0.50     | 0.25     | 1         | 0.005(6)                          |
| O <sup>2-</sup>     | 96h                                                                                                     | 0.042(3) | 0.048(8) | 0.653(4) | 1         | 0.009(8)                          |

Table S4. Rietveld refinement and crystallographic parameters of Sr<sub>2</sub>NaMg<sub>2</sub>V<sub>3</sub>O<sub>12</sub>: 0.12 Dy<sup>3+</sup>.

| Formula             | Sr <sub>1.76</sub> Na <sub>1.12</sub> Dy <sub>0.12</sub> Mg <sub>2</sub> V <sub>3</sub> O <sub>12</sub> |          |          |          |           |                                   |
|---------------------|---------------------------------------------------------------------------------------------------------|----------|----------|----------|-----------|-----------------------------------|
| Crystal system      | Cubic                                                                                                   |          |          |          |           |                                   |
| Space group         | <i>Ia</i> $\bar{3}$ <i>d</i> (230, <i>O<sub>h</sub></i> <sup>10</sup> )                                 |          |          |          |           |                                   |
| Cell Parameters     | <i>a</i> =12.622(6) Å, <i>V</i> = 2011.15 Å <sup>3</sup>                                                |          |          |          |           |                                   |
| Reliability factors | R <sub>wp</sub> = 5.95%, R <sub>p</sub> = 4.61 % and GOF= 1.26                                          |          |          |          |           |                                   |
| Atom                | Site                                                                                                    | x        | y        | z        | Occupancy | B <sub>eq</sub> (Å <sup>2</sup> ) |
| Sr <sup>2+</sup>    | 24c                                                                                                     | 0.375    | 0.5      | 0.25     | 0.65      | 0.009(8)                          |
| Dy <sup>3+</sup>    | 24c                                                                                                     | 0.375    | 0.5      | 0.25     | 0.0167    | 0.009(8)                          |
| Na <sup>+</sup>     | 24c                                                                                                     | 0.375    | 0.5      | 0.25     | 0.333     | 0.009(8)                          |
| Mg <sup>2+</sup>    | 16a                                                                                                     | 0.50     | 0.50     | 0        | 1         | 0.007(9)                          |
| V <sup>5+</sup>     | 24d                                                                                                     | 0.625    | 0.50     | 0.25     | 1         | 0.006(1)                          |
| O <sup>2-</sup>     | 96h                                                                                                     | 0.039(3) | 0.051(4) | 0.655(1) | 1         | 0.009(8)                          |

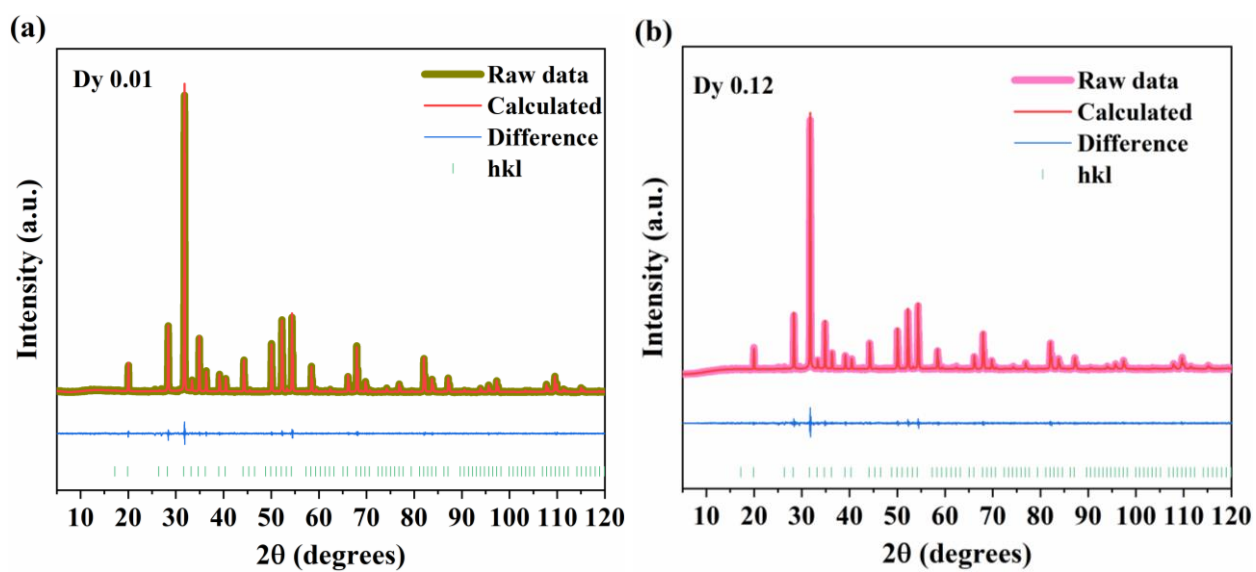

Fig. S1. Rietveld refinement pattern of (a) SNMV: 0.01 Dy<sup>3+</sup> and (b) SNMV: 0.12 Dy<sup>3+</sup>.

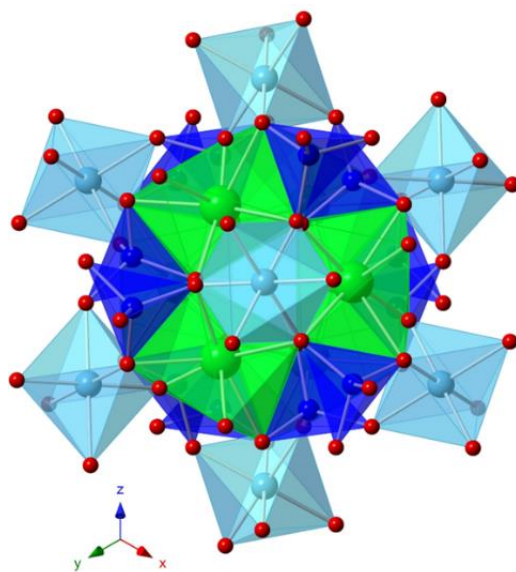

Fig. S2. The crystal structure viewed along [111] axis in which green, cyan, and blue polyhedra represent AO<sub>8</sub> (A= Sr/Na/Dy), MgO<sub>6</sub>, and VO<sub>4</sub> configuration and red spheres represent oxygen ions.

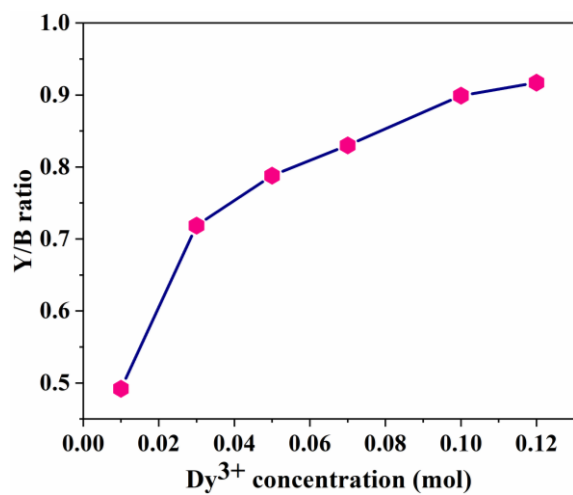

Fig. S3. The variation in the yellow to blue intensity ratio (Y/B) with concentration.

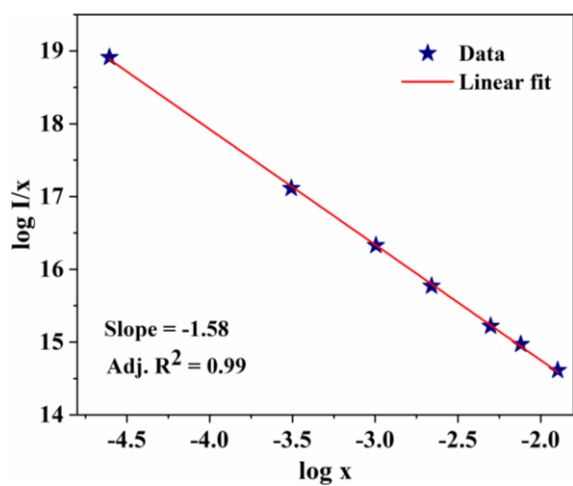

Fig. S4. The  $\log(I/x)$ - $\log(x)$  plot for the transition of Dy<sup>3+</sup> ions in Sr<sub>2</sub>NaMg<sub>2</sub>V<sub>3</sub>O<sub>12</sub>: Dy<sup>3+</sup> phosphor.

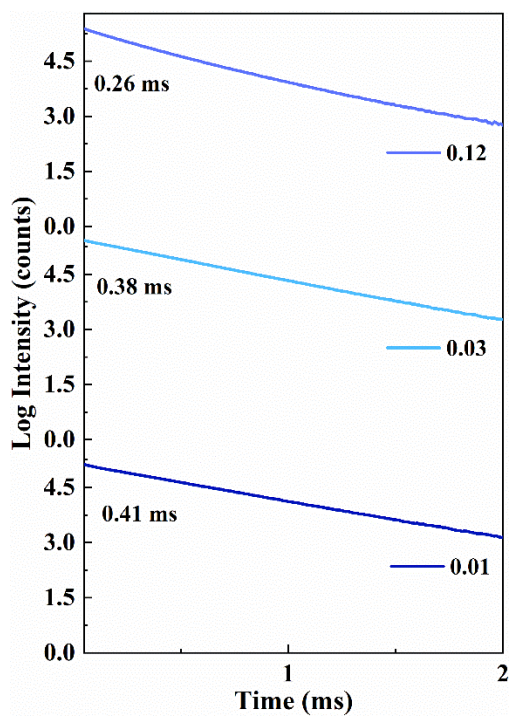

Fig. S5. The Decay curves of  $\text{Sr}_2\text{NaMg}_2\text{V}_3\text{O}_{12}: x\text{Dy}^{3+}$  ( $x=0.01, 0.03,$  and  $0.12$ ) phosphors.

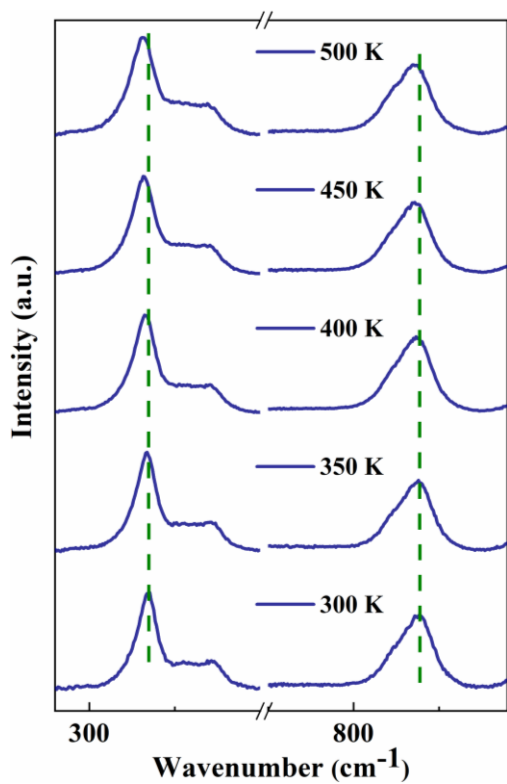

Fig. S6. Temperature-dependent Raman spectra of SNMV: 0.03  $\text{Dy}^{3+}$  phosphor.

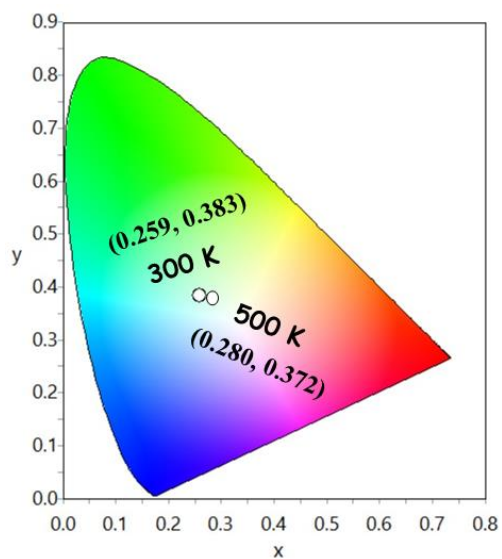

Fig. S7. CIE diagram showing the variation of emission color with temperature.

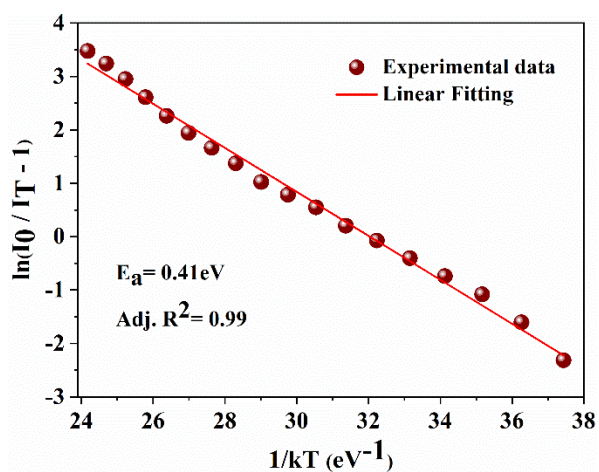

Fig. S8. Linear fit of the Arrhenius equation.
